# Supplementary material
Source: HighWire-hosted journal article supplement (https://bmjopen.bmj.com/content/15/6/e095815)
Supplement: inline-supplementary-material-2 [file inline-supplementary-material-2.pdf]

Table 2. Social support measurement tool

| Name                                                                                                                               | Scale                                                                                                                                        | Cronbach’s alpha |
|------------------------------------------------------------------------------------------------------------------------------------|----------------------------------------------------------------------------------------------------------------------------------------------|------------------|
| Cerquera et al., 2021;<br>Blackberry et al.,2023;<br>Gustafson et al., 2019;<br>Whitebird et al., 2013;<br>Wilkerson et al., 2018; | Medical Outcomes Study (MOS)                                                                                                                 | 0.736-0.921      |
| Chiu et al., 2009;<br>Christie et al.,2022;<br>Marziali and Garcia, 2011;<br>Smith et al., 2018;                                   | Multidimensional Scale of Perceived Social Support (MPSS)                                                                                    | NM               |
| Czaja et al., 2013;<br>Easom et al.,2013;<br>Lykens et al.,2014;<br>Nichols et al.,2011;                                           | 10-21 items from three different broad scales measuring social support                                                                       | NM               |
| Fields et al., 2021;<br>van Wezel et al., 2021;                                                                                    | self-developed scales                                                                                                                        | NM               |
| Xu et al.,2023;                                                                                                                    | 13-item questionnaire consisting of 4 domains: satisfaction with support, social support network, received support and negative interactions | NM               |

|                         |                                                                                                            |      |
|-------------------------|------------------------------------------------------------------------------------------------------------|------|
| Glueckauf et al., 2022; | Social support: the Interpersonal Support Evaluation List (ISEL)                                           | 0.92 |
| Berwig et al.,2022;     | brief form of the Perceived Social Support Questionnaire (F – SozU) to assess the extent of social support | 0.90 |
| Szcześniak et al.,2021  | experiences of emotional and practical support                                                             | NM   |
| Töpfer et al.,2021      | social relationships                                                                                       | NM   |
| Roth et al.,2005        | social support network                                                                                     | NM   |
| Czaja et al.,2018       | social support questionnaire                                                                               | NM   |
| Bass et al.,2013        | supporting resources                                                                                       | NM   |
| Chien and Lee,2011      | social support from the perspectives of satisfaction with social support and formal support                | NM   |
| Bank et al.,2006        |                                                                                                            |      |
| Tompkins and Bell,2009  | support questionnaire                                                                                      | NM   |
| Hébert et al.,2003      | The Inventory of Socially Supportive Behaviors                                                             | NM   |
| Robinson,1988           | Norbeck's Social Support Questionnaire (NSSQ)                                                              | NM   |
| Neal et al ,2024        | Social participation was measured using the Maastricht Social Participation Profile (MSPP)                 | NM   |

|                  |                                                                                          |      |
|------------------|------------------------------------------------------------------------------------------|------|
| Xiao et al ,2024 | the Carers of Older People in Europe Index-Quality of Social Support (The COPE Index-QS) | 0.77 |
|------------------|------------------------------------------------------------------------------------------|------|

NM: Not Mentioned; The multiple blank spaces in Table 2 indicate that the authors of these items share the same scale name and reliability value
