# Supplementary material
Source: HighWire-hosted journal article supplement (https://bmjopen.bmj.com/content/15/6/e095815)
Supplement: inline-supplementary-material-3 [file inline-supplementary-material-3.pdf]

Social support interventions for dementia caregivers

**Table 3** Description of social support interventions

| Author/Year     | sample size |  | Participants Intervention |                 | Duration | Intervention content                                                          |         | Outcomes                    |                                                                                                                        | Results                                                          |
|-----------------|-------------|--|---------------------------|-----------------|----------|-------------------------------------------------------------------------------|---------|-----------------------------|------------------------------------------------------------------------------------------------------------------------|------------------------------------------------------------------|
|                 |             |  | Caregiver type            | Type            |          |                                                                               |         | Social support              | Other outcomes                                                                                                         |                                                                  |
| Neal/2024       | 76 vs 74    |  | ICG                       | Multi-component | 4 weeks  | Use FindMyApps app twice a week                                               |         | MSPP                        | HRQoLL; SSCQ; Costs                                                                                                    | SSCQ: ↑ ; MSPP,HRQoL:NS.Costs: ↓ .                               |
| Xiao/2024       | 131 vs 135  |  | FCG                       | Multi-component | 6 months | Use iSupport, and host a monthly carer peer support meeting lasting 45–60 min |         | The COPE Index-QS           | QoL; Self-efficacy; Behaviours and carers reactions; Carer's perspective of the QoL of the person living with dementia | Mental related QoL: ↑ ; Self- efficacy, social support: NS;      |
| Xu/2023         | 20          |  | African American FCG      | Peer support    | 6 months | The SCP Plus contained a 12 h in-person training with the senior companions.  |         | 13 items from four domains. | Burden and/or stress; Coping skills; Caregiver appraisal; Cultural justifications for caregiving; Caregiver well-being | KAD, social support satisfaction, coping skills: ↑ ; Burden: ↓ . |
| Blackberry/2023 | 113         |  | FCG                       | Peer support    | 32 weeks | Verily model                                                                  | Connect | MOS                         | ZBI; bespoke surveys                                                                                                   | Social support: ↑ ; ZBI: ↓                                       |

Social support interventions for dementia caregivers

| Author/Year    | Participants |                      | Intervention    |          | Outcomes                                                                                                                    |                                                            |                                                                                                                                                    | Results                                                                                                                                                                     |
|----------------|--------------|----------------------|-----------------|----------|-----------------------------------------------------------------------------------------------------------------------------|------------------------------------------------------------|----------------------------------------------------------------------------------------------------------------------------------------------------|-----------------------------------------------------------------------------------------------------------------------------------------------------------------------------|
|                | sample size  | Caregiver type       | Type            | Duration | Intervention content                                                                                                        | Social support                                             | Other outcomes                                                                                                                                     |                                                                                                                                                                             |
| Glueckauf/2022 | 12           | African American FCG | Multi-component | 12 weeks | 12 weekly telephone sessions, 7 one-hour group sessions and 5 one-hour individual goal-setting and implementation sessions. | ISEL                                                       | Severity of CG-identified problems; Depression; Health status; Consequences of caregiving activities                                               | Depression: ↓ ; Perceived social support: ↑ ; CAI: NS.                                                                                                                      |
| Berwig/2022    | 107 vs 104   | FCG                  | Peer support    | 6 months | Telephone-based group meeting                                                                                               | FSozU K22                                                  | Restrictions; Depressed mood states; general complaints; Quality of life; Utilization of support services; Performance in different areas of life. | The mental health domain of quality of life of family carers and perceived social support: ↑<br>Depression: ↓ ;                                                             |
| Christie/2022  | 48 vs 48     | Primary CGs          | Multi-component | 16 weeks | The intervention group had access to Inlife, participants could use Inlife in at their own pace.                            | MSPSS; Received support; Number of friends and family ties | Sense of competence; Feelings of loneliness; Anxiety and depression; Quality of life; Perceived stress                                             | Received support; MSPSS; Number of friends and family ties: NS; Sense of competence; Feelings of loneliness; Anxiety and depression; Perceived stress; Quality of life: NS. |

Social support interventions for dementia caregivers

| Author/Year     | sample size    |  | Participants   |                 | Duration | Intervention content                                                                                                                                                                                                                   | Outcomes                                      |                                                                           | Results                                                                                                           |
|-----------------|----------------|--|----------------|-----------------|----------|----------------------------------------------------------------------------------------------------------------------------------------------------------------------------------------------------------------------------------------|-----------------------------------------------|---------------------------------------------------------------------------|-------------------------------------------------------------------------------------------------------------------|
|                 |                |  | Caregiver type | Type            |          |                                                                                                                                                                                                                                        | Social support                                | Other outcomes                                                            |                                                                                                                   |
| Fields/2021     | 16             |  | FCG            | Peer support    | 3 months | Nine in-home psychoeducational sessions covering one topic per week to their paired ADRD family caregiver over a three-month period were delivered by Each Senior Companion MCSP for both people living with dementia and their carers | Self-developed scale                          | KAD; Coping skills; Caregiver well-being; Burden and/or stress;           | Received social support: ↑ ; KAD, overall stress/burden levels, well-being of doing activities, coping skills: NS |
| Szczerbiec/2021 | 45 vs 21 vs 15 |  | FCG            | Multi-component | 3 months |                                                                                                                                                                                                                                        | Experience of emotional and practical support | Satisfaction; Reasons for participation in the support programme; Burden. | Emotionally supports: ↑ ; Satisfaction: ↑ ; Burden: ↓ .                                                           |

Social support interventions for dementia caregivers

| Author/Year    | Participants |                                    | Intervention       | Outcomes                 |                                                                                                                                                     |                                                                                                 |                                                                                               | Results                                                                                                                                                                                                                                                                         |
|----------------|--------------|------------------------------------|--------------------|--------------------------|-----------------------------------------------------------------------------------------------------------------------------------------------------|-------------------------------------------------------------------------------------------------|-----------------------------------------------------------------------------------------------|---------------------------------------------------------------------------------------------------------------------------------------------------------------------------------------------------------------------------------------------------------------------------------|
|                | sample size  | Caregiver type                     | Type               | Duration                 | Intervention content                                                                                                                                | Social support                                                                                  | Other outcomes                                                                                |                                                                                                                                                                                                                                                                                 |
| Töpfer/2021    | 29 vs 22     | FCG                                | Individual therapy | 6 months                 | The intervention group (IG) received 12 individual therapy sessions (each 50 min) delivered via telephone from Tele.TAnDem intervention.            | Social relationships: The German Version of the World Health Organization QoLBREF (WHOQoL-BREF) | Depression; Caregiver burden; Emotional well-being; Utilization of resources;                 | Changes regarding own illnesses, the living situation with the PwD, the living environment, the employment status, care for any other person than the PwD, and severe illness of any close person in the last 3 years: NS; social relationships: ↑, use of support services: NS |
| van Wezel/2021 | 202 vs 184   | Turkish or Moroccan background FCG | Peer support       | Two 2-hour interventions | Two educational sessions on dementia, each last two hours, with other participants (peers) with the same cultural background (Turkish or Moroccan). | The support received: four self-developed questions                                             | The perceived pressure from informal care; The perceived ability to talk about dementia; KAD; | Support received from family, friends or neighbors, and advice received from a doctor: NS. support received from home-care staff: ↑                                                                                                                                             |

Social support interventions for dementia caregivers

| Author/Year       | Participants |                | Intervention    |          |                                                                                                                                   | Outcomes                     |                                                                                                                         | Results                                                                                                                           |
|-------------------|--------------|----------------|-----------------|----------|-----------------------------------------------------------------------------------------------------------------------------------|------------------------------|-------------------------------------------------------------------------------------------------------------------------|-----------------------------------------------------------------------------------------------------------------------------------|
|                   | sample size  | Caregiver type | Type            | Duration | Intervention content                                                                                                              | Social support               | Other outcomes                                                                                                          |                                                                                                                                   |
| Gustafson Jr/2019 | 16 vs 15     | FCG            | Multi-component | 6 months | Intervention group receiving D-CHESS. Control group receiving a caregiving book.                                                  | MOS                          | Family conflict; Caregiver burden; Loneliness; Anxiety; Satisfaction with care decisions; Depression; Coping competence | All findings: NS; Due to small sample size.                                                                                       |
| Czaja/2018        | 146          | FCG            | Multi-component | 6 months | 12, 60-min individual (6 telephone and 6 face-to-face) educational sessions and skill building and 5 support groups by telephone. | Social Support Questionnaire | Depression; Affective distress; Burden; Caregiving Self- Efficacy; Memory related problems, and disruptive behaviors;   | Depression, overall burden, overall bother: ↓ ; Social support, positive aspects of caregiving or obtaining respite services: NS. |

Social support interventions for dementia caregivers

| Author/Year    |             |                | Participants Intervention |          |                                                                                                                    |                | Outcomes                                                       | Results                                                                   |
|----------------|-------------|----------------|---------------------------|----------|--------------------------------------------------------------------------------------------------------------------|----------------|----------------------------------------------------------------|---------------------------------------------------------------------------|
|                | sample size | Caregiver type | Type                      | Duration | Intervention content                                                                                               | Social support | Other outcomes                                                 |                                                                           |
| Wilkerson/2018 | 60          | Informal CGs   | Peer support              | 6 weeks  | Participants were allotted to two private Facebook groups receiving the intervention over the course of six weeks. | MOS            | Burden; Frequencies of emotional problems; Learning activities | Burden; ↓ ; Perceived stress: ↓ ; Emotional and informational supports: ↑ |
| Smith/2018     | 16          | FCG            | Peer support              | 6 months | Carers receiving one-to-one peer support or befriending from volunteers at least a weekly basis.                   | MSPSS          | Depression and anxiety; Loneliness                             | Perceived social support: ↑ ; Depression, anxiety and loneliness: NS.     |

Social support interventions for dementia caregivers

| Author/Year  | Participants |                | Intervention      |          | Outcomes                                                                                                                                                                 |                                                                                                           |                                         | Results                                                                                                                                                                                                                                                                                  |
|--------------|--------------|----------------|-------------------|----------|--------------------------------------------------------------------------------------------------------------------------------------------------------------------------|-----------------------------------------------------------------------------------------------------------|-----------------------------------------|------------------------------------------------------------------------------------------------------------------------------------------------------------------------------------------------------------------------------------------------------------------------------------------|
|              | sample size  | Caregiver type | Type              | Duration | Intervention content                                                                                                                                                     | Social support                                                                                            | Other outcomes                          |                                                                                                                                                                                                                                                                                          |
| Tremont/2017 | 105 vs 94    | Informal CGs   | Counselling group | 6 months | Trained therapists contacted caregivers 16 times use telephone for 6 months, providing recommendations for resources, information about dementia, and emotional support. | Community support services used times, healthcare resource use                                            | Burden; Depression; Behavior problems   | Caregivers who received the FITT-C used community support services significantly more than those receiving TS; FITT-C caregivers had a significantly lower rate of ED visits and hospital stays; Care recipient use of community or medical resources did not differ according to group. |
| Lykens/2014  | 494          | FCG            | Multi-component   | 6 months | Certified interventionists deliver the intervention included 12 sessions [9 in-home, and 3 telephone sessions], five structured telephone support group sessions         | 10 item Risk Assessment of feeling isolated, availability of someone to talk to or assist with caregiving | Caregiver Burden; Depression; Self-Care | Caregiver burden and Depression: ↓, Social support and self-care: a slight but not statistically significant increase after the service, which is in the correct direction.                                                                                                              |

Social support interventions for dementia caregivers

| Author/Year    | Participants |                | Intervention    |           |                                                                                                 | Outcomes                                                                              |                                            | Results                                                                                                                                                                                                                                              |
|----------------|--------------|----------------|-----------------|-----------|-------------------------------------------------------------------------------------------------|---------------------------------------------------------------------------------------|--------------------------------------------|------------------------------------------------------------------------------------------------------------------------------------------------------------------------------------------------------------------------------------------------------|
|                |              |                |                 |           |                                                                                                 |                                                                                       |                                            |                                                                                                                                                                                                                                                      |
|                | sample size  | Caregiver type | Type            | Duration  | Intervention content                                                                            | Social outcomes support                                                               | Other                                      |                                                                                                                                                                                                                                                      |
| Whitebird/2013 | 38 vs 40     | Primary CGs    | MBSR            | 8 weeks   | 8 weekly 2.5-hr in-person group sessions.                                                       | MOS                                                                                   | Stress; Mental Health; Burden              | MBSR was more effective at reducing stress, decreasing depression, and improving overall mental health than CCES. Both interventions improved caregiver mental health and were similarly effective at improving anxiety, social support, and burden. |
| Bass/2013      | 299 vs 187   | FCG            | Multi-component | 12 months | Partners in Dementia Care: initial assessment; action plan; Ongoing Monitoring and Reassessment | Support resource: 1) number of informal helpers; 2) use of caregiver support services | Unmet needs; Caregiver strains; Depression | Three types of caregiver strains, depression, unmet needs: ↓ , and two support resources: ↑                                                                                                                                                          |



Social support interventions for dementia caregivers

| Author/Year | Participants Intervention |                |                 |          |                                                                                                                                 | Outcomes                                                                                                                           |                                                                                                                                                                                                      | Results                                                                                                                                            |
|-------------|---------------------------|----------------|-----------------|----------|---------------------------------------------------------------------------------------------------------------------------------|------------------------------------------------------------------------------------------------------------------------------------|------------------------------------------------------------------------------------------------------------------------------------------------------------------------------------------------------|----------------------------------------------------------------------------------------------------------------------------------------------------|
|             | sample size               | Caregiver type | Type            | Duration | Intervention content                                                                                                            | Social support                                                                                                                     | Other outcomes                                                                                                                                                                                       |                                                                                                                                                    |
| Czaja/2013  | 36 vs 63                  | FCG            | Multi-component | 5 months | A technology based multi-component psychosocial intervention was delivered in-home and via videophone technology over 5 months. | 10 items assessing three domains of support: (a) received support(b) satisfaction with support(c) negative interaction s/ supports | Burden; Depression; Positive aspects of caregiving                                                                                                                                                   | Caregiver burden: ↓ ; satisfaction with social support: ↑ ; appreciation of the positive aspects of caregiving: ↑ ;                                |
| Easom/2013  | 85                        | FCG            | Multi-component | 6 months | Nine face-to-face (in the home) and three telephone sessions, tailored education and support.                                   | A Risk Appraisal Assessment: three questions of social support                                                                     | A Risk Appraisal Assessment: five questions addressing caregiver safety, five questions assessing caregiver health behaviors, three questions targeting stress, two items on behavioral frustrations | The scores for Self-Care and Social Support increased slightly post-service were not statistically significant, which is in the correct direction. |

Social support interventions for dementia caregivers

| Author/Year   |             | Participants Intervention |                 |          | Outcomes                                                                                                                                                                                                                                                                                                     |                                                        |                                                                                                                                | Results                                                                                                                                                                                                                                                                                    |
|---------------|-------------|---------------------------|-----------------|----------|--------------------------------------------------------------------------------------------------------------------------------------------------------------------------------------------------------------------------------------------------------------------------------------------------------------|--------------------------------------------------------|--------------------------------------------------------------------------------------------------------------------------------|--------------------------------------------------------------------------------------------------------------------------------------------------------------------------------------------------------------------------------------------------------------------------------------------|
|               | sample size | Caregiver type            | Type            | Duration | Intervention content                                                                                                                                                                                                                                                                                         | Social support                                         | Other outcomes                                                                                                                 |                                                                                                                                                                                                                                                                                            |
| Nichols/2011  | 127         | FCG                       | Multi-component | 6 months | The intervention included education, support, and skills training to address 5 caregiving risk areas: safety, social support, problem behaviors, depression, and caregiver health.                                                                                                                           | The 21- question risk appraisal, adapted from REACH II | caregiving risk areas of advanced care planning, education, safety, health and healthy behaviors, and caregiving frustrations. | Depression, burden, impact of depression on daily lives, and caregiving frustrations: ↓ ; Social support: NS.                                                                                                                                                                              |
| Marziali/2011 | 91          | FCG                       | Multi-component | 10 weeks | Online Chat Group Intervention: the Chat Group was provided with access to the CFO website for 6 months; Online Video Conferencing Support Group Intervention:10 weekly sessions in mutual self-help mode with 1 of the group members manipulating the technical aspects of the video-conferencing meetings. | MSPSS                                                  | Caregiver health; Depressive symptoms; Caregiving distress                                                                     | The Video Group demonstrated greater improvement in mental health status. For the Video Group, improvements in neuroticism, self-efficacy, and social support were associated with lower stress response to coping with the care recipient's decline in function and cognitive impairment. |

Social support interventions for dementia caregivers

| Author/Year            | Participants |                |                 | Intervention |                                                                                                                                                                          | Outcomes                                                                        |                                                                                                                   | Results                                                                                                                                                                        |
|------------------------|--------------|----------------|-----------------|--------------|--------------------------------------------------------------------------------------------------------------------------------------------------------------------------|---------------------------------------------------------------------------------|-------------------------------------------------------------------------------------------------------------------|--------------------------------------------------------------------------------------------------------------------------------------------------------------------------------|
|                        | sample size  | Caregiver type | Type            | Duration     | Intervention content                                                                                                                                                     | Social support                                                                  | Other outcomes                                                                                                    |                                                                                                                                                                                |
| Chien/2011             | 46 vs 46     | FCG            | Multi-component | 6 months     | DFCP                                                                                                                                                                     | satisfaction with social support available: SSQ6; Formal support services: FSSI | Burden; QOL                                                                                                       | Intervention group's utilization of family services was significantly decreased at the 18-month follow-up, the routine care group's service utilization had a slight increase. |
| Tompkins and Bell/2009 | 367          | FCG            | Health educated | 12h          | 12h training                                                                                                                                                             | SCP usage questionnaire.                                                        | Overall satisfaction; Depression; Overall services used                                                           | Depression: ↓ ; Overall services used: ↑ ;                                                                                                                                     |
| Chiu/2009              | 35           | FCG            | Multi-component | 6 months     | The ICSS supported two Internet-based communication tools: (a) a caregiver information handbook, and (b) personalized e-mail communication between client and clinician. | MSPSS                                                                           | Family burden; Caregiver's ability; Depression; Perceived overall health; PAC; Care recipients' functioning level | Burden, social support and health behavior: NS; depression: ↓ .                                                                                                                |

Social support interventions for dementia caregivers

| Author/Year |             | Participants Intervention |                   |           |                                               | Outcomes                                                                                                                                                                         |                                                                              | Results                                                                                                                                                                                                                                                                                                                                                             |
|-------------|-------------|---------------------------|-------------------|-----------|-----------------------------------------------|----------------------------------------------------------------------------------------------------------------------------------------------------------------------------------|------------------------------------------------------------------------------|---------------------------------------------------------------------------------------------------------------------------------------------------------------------------------------------------------------------------------------------------------------------------------------------------------------------------------------------------------------------|
|             | sample size | Caregiver type            | Type              | Duration  | Intervention content                          | Social support                                                                                                                                                                   | Other outcomes                                                               |                                                                                                                                                                                                                                                                                                                                                                     |
| Bank/2006   | 41          | FCG                       | Multi-component   | 18mont hs | Professional provides telephone support group | Support Group Questionnai re                                                                                                                                                     | NO                                                                           | Support group attendance: NS; Intervention Improved relationships among family members, and telephone support groups made them more willing to participate in community support groups                                                                                                                                                                              |
| Roth/2005   | 163 vs 149  | Spous e CGs               | Counselling group | 12 months | Counseling and support                        | Social support network: caregiver's Satisfaction: methods of Stokes; caregivers' reports of the frequency at which they received information or assistance from support persons. | Stress appraisals of care recipient memory and behavior problems; Depression | Intervention group achieved significant increases after 1 year on 8 of the 11 indicators, which were total size of social network, number of close family members, general satisfaction, satisfaction with assistance, satisfaction with emotional support, telephone calls (no. per month), personal visits (no. per month), sitting with patient (no. per month). |

Social support interventions for dementia caregivers

| Author/Year   | Participants   |                | Intervention     |          | Outcomes                                                                                                 |                                                |                                                                                          | Results                                                                                                                |
|---------------|----------------|----------------|------------------|----------|----------------------------------------------------------------------------------------------------------|------------------------------------------------|------------------------------------------------------------------------------------------|------------------------------------------------------------------------------------------------------------------------|
|               | sample size    | Caregiver type | Type             | Duration | Intervention content                                                                                     | Social support                                 | Other outcomes                                                                           |                                                                                                                        |
| Hébert/2003   | 60 vs 56       | Primary CGs    | Multi-component  | 16 weeks | Participants in the study group had fifteen 2-hr weekly sessions focusing on stress appraisal and coping | The Inventory of Socially Supportive Behaviors | Frequency of behavioral and memory problems; Desire to institutionalize; Subjective load | Institutionalization: ↓ ;personal efficacy: ↑ ;other outcomes: NS.                                                     |
| Mercedes/2002 | 19 vs 19 vs 20 | FCG            | Multi-component  | 8 weeks  | 1.multicomponent + respite group; 2. respite group; 3. control group                                     | MOS                                            | Burden                                                                                   | The control group social support: ↓ ; the multicomponent plus respite group social support: ↑ after10-month follow-up. |
| Robinson/1988 | 11 vs 9        | FCG            | Health education | 8 weeks  | Social skill training program                                                                            | NSSQ                                           | Self-esteem; Social skills; Caregiving burden                                            | Objective and subjective burden: ↓ ; the treatment group and control group of social support: NS.                      |

FCG: Family caregivers; ICG: Informal caregivers; MSPP : Maastricht Social Participation Profile; HRQoL: Health Related Quality of Life; SSCQ: the Short Sense of Competence Questionnaire; QoL:Quality of Life; The COPE Index-QS: the Carers of Older People in Europe Index-Quality of Social Support;;NR: not reported; SSRS: Social Support Scale; CAI: Caregiver Appraisal Inventory; CBI: Caregiver Burden Inventory; SCSO: Simplified Coping Style Questionnaire; GSES: General Self-Efficacy Scale; ↑ : significant improvement; NS: No Significant difference; ↓ : significant reduction; MSPSS: Multidimensional Scale of Perceived Social Support; PAC: Positive Aspects of Caregiving; CGs: Caregivers; MOS: Medical Outcomes Study; KAD: Knowledge of Alzheimer's disease/dementia; NSSQ: Norbeck's Social Support Questionnaire; ISEL: Interpersonal Support Evaluation List; MCSP: Dutch Meeting Centers Support Programme; DFCEP: Dementia Family Care Programme; SSQ6: Six-item Social Support Questionnaire; FSSI: Family Support Services Index; MBSR: Mindfulness-Based Stress Reduction; SCP Plus: Senior Companion Program Plus; PwD: people with dementia; ZBI: Zarit Burden Interview
